# Supplementary material for: Identification of genes related to salt stress tolerance using intron-length polymorphic markers, association mapping and virus-induced gene silencing in cotton
Source: PubMed Central journal article supplement (PMC5428780; doi:10.1038/s41598-017-00617-7), 2017-04-03
Supplement: 41598_2017_617_MOESM1_ESM.pdf [file 41598_2017_617_MOESM1_ESM.pdf]

Identification of genes related to salt stress tolerance using intron-length polymorphic markers, association mapping and virus-induced gene silencing in cotton

Caiping Cai\*, Shuang Wu\*, Erli Niu, Chaoze Cheng, Wangzhen Guo\*\*

State Key Laboratory of Crop Genetics & Germplasm Enhancement, Hybrid Cotton R & D Engineering Research Center, Ministry of Education, Nanjing Agricultural University, Nanjing 210095, China

\* These authors contributed equally to this work.

\*\* Correspondence should be addressed to Dr. Wangzhen Guo: State Key Laboratory of Crop Genetics & Germplasm Enhancement, Nanjing Agricultural University, Nanjing 210095, Jiangsu Province, P. R. China. E-mail: [moelab@njau.edu.cn](mailto:moelab@njau.edu.cn); Tel/Fax: +86 25 84396523

**Supplementary Table S1:** P-value of the multiple comparisons among 14 polymorphic ILP markers and ten salt stress traits using LSR method.

| Marker  | RCC       | RPH       | RRDM      | RSDM      | RSOD      | RPOD      | RCAT      | RMDA      | RGR       | RGP       |
|---------|-----------|-----------|-----------|-----------|-----------|-----------|-----------|-----------|-----------|-----------|
| EPIC43  | 0.330189  | 0.2664683 | 0.140136  | 0.1265673 | 0.6400973 | 0.6532019 | 0.9503633 | 0.6908821 | 0.668473  | 0.2629496 |
| EPIC50  | 0.9477636 | 0.2490145 | 0.0455406 | 0.0079397 | 0.9374364 | 0.5231868 | 0.4002706 | 0.5099329 | 0.2996398 | 0.3932581 |
| EPIC66  | 0.2236345 | 0.9293267 | 0.0794249 | 0.4083292 | 0.1721954 | 0.9240334 | 0.1932283 | 0.3105367 | 0.7220842 | 0.4235914 |
| EPIC93  | 0.0501571 | 0.4840041 | 0.7604592 | 0.9174137 | 0.669342  | 0.8465756 | 0.6911036 | 0.4439081 | 0.2866731 | 0.3915507 |
| EPIC109 | 0.0461184 | 0.1013036 | 0.40708   | 0.43878   | 0.4571237 | 0.0009106 | 0.9886513 | 0.0059544 | 0.9252658 | 0.9011823 |
| EPIC211 | 0.4809108 | 0.0260312 | 0.8449109 | 0.5201326 | 0.956907  | 0.4401007 | 0.3541233 | 0.565843  | 0.1633502 | 0.117503  |
| EPIC274 | 0.5764312 | 0.5907478 | 0.0585886 | 0.0581699 | 0.5444198 | 0.9820513 | 0.6926915 | 0.0322182 | 0.1748746 | 0.1865865 |
| EPIC309 | 0.0044862 | 0.1800835 | 0.814908  | 0.0850269 | 0.7562405 | 0.0227624 | 0.3400747 | 0.5513273 | 0.6877445 | 0.2890102 |
| EPIC356 | 0.1263631 | 0.7392651 | 0.5717323 | 0.358869  | 0.0419185 | 0.6977786 | 0.8338784 | 0.5162895 | 0.0057297 | 0.0054428 |
| EPIC369 | 0.194749  | 0.8782733 | 0.1537708 | 0.2316509 | 0.5919485 | 0.9406927 | 0.2702406 | 0.7294119 | 0.2555029 | 0.2370962 |
| EPIC477 | 0.0002415 | 0.0003096 | 0.2226922 | 0.003155  | 0.0915398 | 0.0071576 | 0.3597189 | 0.0799785 | 0.8105475 | 0.3845179 |
| EPIC525 | 0.256824  | 0.069049  | 0.977433  | 0.262719  | 0.132605  | 0.090342  | 0.479074  | 0.965627  | 0.793748  | 0.563122  |
| EPIC526 | 0.548671  | 0.178552  | 0.45933   | 0.327821  | 0.224486  | 0.773206  | 0.233163  | 0.808144  | 0.574837  | 0.368094  |
| EPIC531 | 0.010369  | 0.001165  | 0.021114  | 0.11808   | 0.633237  | 0.000252  | 0.599474  | 0.000872  | 0.101017  | 0.338966  |

Red indicates significant difference at  $P < 0.05$ , and box in yellow filled means significant difference at  $P < 0.01$ .

**RCC:Relative Chlorophyll Content; RPH:Relative plant height; RRDM:Relative root dry matter; RSDM:Relative shoot dry matter; RSOD:Relative SOD activity; RPOD:Relative POD activity; RCAT:Relative CAT activity; RMDA:Relative MDA content; RGR:Relative germination rate; RGP:Relative germination percentage.**

**Supplementary Table S2:** P-value and explained phenotypic variation of 18 marker-trait associations using MLM and GLM models.

| Trait | Marker  | p-MLM     | r <sup>2</sup> -MLM | p-GLM     | r <sup>2</sup> -GLM |
|-------|---------|-----------|---------------------|-----------|---------------------|
| RCC   | EPIC309 | 0.0661    | 0.0193              | 0.0385    | 0.0264              |
| RCC   | EPIC477 | 0.0106    | 0.0379              | 0.0133    | 0.0376              |
| RCC   | EPIC531 | 0.0207    | 0.0461              | 0.0207    | 0.0461              |
| RPH   | EPIC211 | 0.0243    | 0.0414              | 0.0243    | 0.0414              |
| RPH   | EPIC309 | 0.0302    | 0.0241              | 0.0481    | 0.0224              |
| RPH   | EPIC477 | 0.0187    | 0.0321              | 0.0187    | 0.0322              |
| RRDM  | EPIC50  | 0.0438    | 0.0268              | 0.0472    | 0.0277              |
| RRDM  | EPIC66  | 0.0396    | 0.0208              | 0.029     | 0.0204              |
| RSDM  | EPIC50  | 0.0045    | 0.0377              | 0.0091    | 0.039               |
| RSOD  | EPIC531 | 0.0153    | 0.0525              | 0.0151    | 0.0531              |
| RPOD  | EPIC109 | 0.0265    | 0.0288              | 0.0265    | 0.0288              |
| RPOD  | EPIC531 | 0.0164    | 0.0458              | 0.0164    | 0.0458              |
| RCAT  | EPIC477 | 0.0308    | 0.0318              | 0.0308    | 0.0318              |
| RMDA  | EPIC109 | 0.0115    | 0.0408              | 0.0099    | 0.0428              |
| RMDA  | EPIC274 | 0.0153    | 0.0321              | 0.0221    | 0.0338              |
| RMDA  | EPIC531 | 9.187E-05 | 0.1007              | 6.715E-05 | 0.11                |
| RGR   | EPIC356 | 0.0086    | 0.0349              | 0.0086    | 0.0349              |
| RGP   | EPIC356 | 0.0096    | 0.0337              | 0.0094    | 0.034               |

**\*\* p<0.01; \* p<0.05**

**RCC:Relative Chlorophyll Content; RPH:Relative plant height; RRDM:Relative root dry matter; RSDM:Relative shoot dry matter; RSOD:Relative SOD activity; RPOD:Relative POD activity; RCAT:Relative CAT activity; RMDA:Relative MDA content; RGR:Relative germination rate; RGP:Relative germination percentage.**

**Supplementary Table S3:** Information of 267 tested accessions in this study.

| No. | Species / Cultivar                        | Genomic group / Ecological area | Introduced or released year | Species                                           |
|-----|-------------------------------------------|---------------------------------|-----------------------------|---------------------------------------------------|
| 1   | <i>G. herbaceum</i> var. <i>africanum</i> | A1                              | unknown                     | Wild diploid species                              |
| 2   | <i>G. raimondii</i>                       | D5                              | unknown                     | Wild diploid species                              |
| 3   | <i>G. barbadense</i> cv. Hai7124          | AADD                            | unknown                     | Cultivated tetraploid sea island cotton accession |
| 4   | <i>G. hirsutum</i> acc. TM-1              | AADD                            | unknown                     | Cultivated tetraploid upland cotton accession     |
| 5   | <i>G. hirsutum</i> cv. Junmian1           | Northwestern inland             | 1979                        | Cultivated tetraploid upland cotton accession     |
| 6   | Sumian9                                   | The Yangtze River               | 1995                        | Cultivated tetraploid upland cotton accession     |
| 7   | Ejing1                                    | The Yangtze River               | 1992                        | Cultivated tetraploid upland cotton accession     |
| 8   | Daihongdai                                | The Yangtze River               | 1984                        | Cultivated tetraploid upland cotton accession     |
| 9   | Simian3                                   | The Yangtze River               | 1993                        | Cultivated tetraploid upland cotton accession     |
| 10  | Esha28                                    | The Yangtze River               | 1990                        | Cultivated tetraploid upland cotton accession     |
| 11  | Sumian12                                  | The Yangtze River               | 1997                        | Cultivated tetraploid upland cotton accession     |
| 12  | Xiangmian16                               | The Yangtze River               | 1994                        | Cultivated tetraploid upland cotton accession     |
| 13  | Simian2                                   | The Yangtze River               | 1984                        | Cultivated tetraploid upland cotton accession     |
| 14  | Xuzhou514                                 | The Yangtze River               | 1990                        | Cultivated tetraploid upland cotton accession     |
| 15  | 52-128                                    | The Yangtze River               | 1952                        | Cultivated tetraploid upland cotton accession     |
| 16  | Emian14                                   | The Yangtze River               | 1990                        | Cultivated tetraploid upland cotton accession     |
| 17  | Yanmian48                                 | The Yangtze River               | 1990                        | Cultivated tetraploid upland cotton accession     |
| 18  | Sumian5                                   | The Yangtze River               | 1993                        | Cultivated tetraploid upland cotton accession     |
| 19  | Sumian3                                   | The Yangtze River               | 1990                        | Cultivated tetraploid upland cotton accession     |
| 20  | Xiangmian10                               | The Yangtze River               | 1982                        | Cultivated tetraploid upland cotton accession     |
| 21  | Dongting1                                 | The Yangtze River               | 1955                        | Cultivated tetraploid upland cotton accession     |
| 22  | Chuanmian56                               | The Yangtze River               | 1992                        | Cultivated tetraploid upland cotton accession     |
| 23  | Hua101                                    | The Yangtze River               | 1992                        | Cultivated tetraploid upland cotton accession     |
| 24  | Sumian2                                   | The Yangtze River               | 1985                        | Cultivated tetraploid upland cotton accession     |
| 25  | Ganmian8                                  | The Yangtze River               | 1991                        | Cultivated tetraploid upland cotton accession     |
| 26  | Ejing92                                   | The Yangtze River               | 1990                        | Cultivated tetraploid upland cotton accession     |
| 27  | Yanmian1                                  | The Yangtze River               | 1987                        | Cultivated tetraploid upland cotton accession     |
| 28  | Wanmian3                                  | The Yangtze River               | 1978                        | Cultivated tetraploid upland cotton accession     |
| 29  | Sumian4                                   | The Yangtze River               | 1992                        | Cultivated tetraploid upland cotton accession     |

|    |              |                   |      |                                               |
|----|--------------|-------------------|------|-----------------------------------------------|
| 30 | Sumian7      | The Yangtze River | 1994 | Cultivated tetraploid upland cotton accession |
| 31 | Sumian8      | The Yangtze River | 1995 | Cultivated tetraploid upland cotton accession |
| 32 | Sumian11     | The Yangtze River | 1997 | Cultivated tetraploid upland cotton accession |
| 33 | Sumian15     | The Yangtze River | 1999 | Cultivated tetraploid upland cotton accession |
| 34 | Sumian20     | The Yangtze River | 2002 | Cultivated tetraploid upland cotton accession |
| 35 | Sumian22     | The Yangtze River | 2002 | Cultivated tetraploid upland cotton accession |
| 36 | Simian1      | The Yangtze River | 1973 | Cultivated tetraploid upland cotton accession |
| 37 | Siyang331    | The Yangtze River | 1982 | Cultivated tetraploid upland cotton accession |
| 38 | Nantong5     | The Yangtze River | 1966 | Cultivated tetraploid upland cotton accession |
| 39 | Humian204    | The Yangtze River | 1974 | Cultivated tetraploid upland cotton accession |
| 40 | Eguangmian   | The Yangtze River | 1985 | Cultivated tetraploid upland cotton accession |
| 41 | Emian4       | The Yangtze River | 1965 | Cultivated tetraploid upland cotton accession |
| 42 | Emian6       | The Yangtze River | 1970 | Cultivated tetraploid upland cotton accession |
| 43 | Emian7       | The Yangtze River | 1971 | Cultivated tetraploid upland cotton accession |
| 44 | Emian9       | The Yangtze River | 1972 | Cultivated tetraploid upland cotton accession |
| 45 | Emian12      | The Yangtze River | 1984 | Cultivated tetraploid upland cotton accession |
| 46 | Emian13      | The Yangtze River | 1990 | Cultivated tetraploid upland cotton accession |
| 47 | Emian17      | The Yangtze River | 1992 | Cultivated tetraploid upland cotton accession |
| 48 | Emian18      | The Yangtze River | 1993 | Cultivated tetraploid upland cotton accession |
| 49 | Emian20      | The Yangtze River | 1994 | Cultivated tetraploid upland cotton accession |
| 50 | Emian21      | The Yangtze River | 1996 | Cultivated tetraploid upland cotton accession |
| 51 | Emian23      | The Yangtze River | 2003 | Cultivated tetraploid upland cotton accession |
| 52 | Ekangmian2   | The Yangtze River | 1993 | Cultivated tetraploid upland cotton accession |
| 53 | Ekangmian3   | The Yangtze River | 1995 | Cultivated tetraploid upland cotton accession |
| 54 | Ekangmian8   | The Yangtze River | 1998 | Cultivated tetraploid upland cotton accession |
| 55 | Ekangmian9   | The Yangtze River | 1999 | Cultivated tetraploid upland cotton accession |
| 56 | Ekangmian10  | The Yangtze River | 1999 | Cultivated tetraploid upland cotton accession |
| 57 | Huakangmian1 | The Yangtze River | 2002 | Cultivated tetraploid upland cotton accession |
| 58 | Yishuhong    | The Yangtze River | 1953 | Cultivated tetraploid upland cotton accession |
| 59 | Xiangmian11  | The Yangtze River | 1985 | Cultivated tetraploid upland cotton accession |
| 60 | Xiangmian12  | The Yangtze River | 1988 | Cultivated tetraploid upland cotton accession |
| 61 | Xiangmian13  | The Yangtze River | 1989 | Cultivated tetraploid upland cotton accession |

|    |                |                   |         |                                               |
|----|----------------|-------------------|---------|-----------------------------------------------|
| 62 | Xiang4108      | The Yangtze River | 1984    | Cultivated tetraploid upland cotton accession |
| 63 | Chuanmian30    | The Yangtze River | 1995    | Cultivated tetraploid upland cotton accession |
| 64 | Chuanmian45    | The Yangtze River | 2000    | Cultivated tetraploid upland cotton accession |
| 65 | Chuanmian239   | The Yangtze River | 1999    | Cultivated tetraploid upland cotton accession |
| 66 | Shumian1       | The Yangtze River | 2000    | Cultivated tetraploid upland cotton accession |
| 67 | Wanmian17      | The Yangtze River | 2000    | Cultivated tetraploid upland cotton accession |
| 68 | Wanmian73-10   | The Yangtze River | 1985    | Cultivated tetraploid upland cotton accession |
| 69 | Zhemian11      | The Yangtze River | 1997    | Cultivated tetraploid upland cotton accession |
| 70 | Yumian1-1      | The Yangtze River | 2002    | Cultivated tetraploid upland cotton accession |
| 71 | I4005          | The Yangtze River | unknown | Cultivated tetraploid upland cotton accession |
| 72 | Yan1074        | The Yangtze River | unknown | Cultivated tetraploid upland cotton accession |
| 73 | Xuzhou142      | The Yellow River  | 1973    | Cultivated tetraploid upland cotton accession |
| 74 | Jimian8        | The Yellow River  | 1983    | Cultivated tetraploid upland cotton accession |
| 75 | Lumian1        | The Yellow River  | 1979    | Cultivated tetraploid upland cotton accession |
| 76 | Zhongmiansuo3  | The Yellow River  | 1960    | Cultivated tetraploid upland cotton accession |
| 77 | Zhongmiansuo16 | The Yellow River  | 1990    | Cultivated tetraploid upland cotton accession |
| 78 | Jimian12       | The Yellow River  | 1986    | Cultivated tetraploid upland cotton accession |
| 79 | Shan1155       | The Yellow River  | 1978    | Cultivated tetraploid upland cotton accession |
| 80 | Shiyuan321     | The Yellow River  | 1998    | Cultivated tetraploid upland cotton accession |
| 81 | Zhongmiansuo12 | The Yellow River  | 1989    | Cultivated tetraploid upland cotton accession |
| 82 | Zhongmiansuo19 | The Yellow River  | 1992    | Cultivated tetraploid upland cotton accession |
| 83 | Zhongmiansuo23 | The Yellow River  | 1995    | Cultivated tetraploid upland cotton accession |
| 84 | Lumian6        | The Yellow River  | 1984    | Cultivated tetraploid upland cotton accession |
| 85 | Zhongmiansuo35 | The Yellow River  | 1999    | Cultivated tetraploid upland cotton accession |
| 86 | Zhongmiansuo41 | The Yellow River  | 2002    | Cultivated tetraploid upland cotton accession |
| 87 | Shiduan5       | The Yellow River  | 1960    | Cultivated tetraploid upland cotton accession |
| 88 | Zhongmiansuo5  | The Yellow River  | 1971    | Cultivated tetraploid upland cotton accession |
| 89 | Keyi2          | The Yellow River  | 1970    | Cultivated tetraploid upland cotton accession |
| 90 | Lumian2        | The Yellow River  | 1983    | Cultivated tetraploid upland cotton accession |
| 91 | Zhongmiansuo17 | The Yellow River  | 1990    | Cultivated tetraploid upland cotton accession |
| 92 | Jingsimian     | The Yellow River  | 1942    | Cultivated tetraploid upland cotton accession |
| 93 | Yumian1        | The Yellow River  | 1981    | Cultivated tetraploid upland cotton accession |

|     |                |                  |      |                                               |
|-----|----------------|------------------|------|-----------------------------------------------|
| 94  | 86-1           | The Yellow River | 1975 | Cultivated tetraploid upland cotton accession |
| 95  | Shan401        | The Yellow River | 1965 | Cultivated tetraploid upland cotton accession |
| 96  | Jimian7        | The Yellow River | 1982 | Cultivated tetraploid upland cotton accession |
| 97  | Zhongmiansuo45 | The Yellow River | 2003 | Cultivated tetraploid upland cotton accession |
| 98  | Yumian5        | The Yellow River | 1989 | Cultivated tetraploid upland cotton accession |
| 99  | Zhongmiansuo9  | The Yellow River | 1973 | Cultivated tetraploid upland cotton accession |
| 100 | Zhongmiansuo24 | The Yellow River | 1997 | Cultivated tetraploid upland cotton accession |
| 101 | Zhongmiansuo25 | The Yellow River | 1995 | Cultivated tetraploid upland cotton accession |
| 102 | Zhongmiansuo27 | The Yellow River | 1998 | Cultivated tetraploid upland cotton accession |
| 103 | Zhongmiansuo30 | The Yellow River | 1998 | Cultivated tetraploid upland cotton accession |
| 104 | Zhongmiansuo40 | The Yellow River | 2002 | Cultivated tetraploid upland cotton accession |
| 105 | Zhongmiansuo43 | The Yellow River | 2005 | Cultivated tetraploid upland cotton accession |
| 106 | Zhongmiansuo44 | The Yellow River | 2004 | Cultivated tetraploid upland cotton accession |
| 107 | Zhongmiansuo49 | The Yellow River | 2004 | Cultivated tetraploid upland cotton accession |
| 108 | Zhongmiansuo50 | The Yellow River | 2005 | Cultivated tetraploid upland cotton accession |
| 109 | Zhongzhimian2  | The Yellow River | 2005 | Cultivated tetraploid upland cotton accession |
| 110 | Henan69        | The Yellow River | 1970 | Cultivated tetraploid upland cotton accession |
| 111 | Yumian8        | The Yellow River | 1993 | Cultivated tetraploid upland cotton accession |
| 112 | Yumian9        | The Yellow River | 1994 | Cultivated tetraploid upland cotton accession |
| 113 | Yumian11       | The Yellow River | 1994 | Cultivated tetraploid upland cotton accession |
| 114 | Yumian15       | The Yellow River | 1997 | Cultivated tetraploid upland cotton accession |
| 115 | Yumian17       | The Yellow River | 1997 | Cultivated tetraploid upland cotton accession |
| 116 | Yumian18       | The Yellow River | 1998 | Cultivated tetraploid upland cotton accession |
| 117 | Yumian19       | The Yellow River | 1999 | Cultivated tetraploid upland cotton accession |
| 118 | Yumian20       | The Yellow River | 1999 | Cultivated tetraploid upland cotton accession |
| 119 | Yumian112      | The Yellow River | 2002 | Cultivated tetraploid upland cotton accession |
| 120 | Yuzao73        | The Yellow River | 2002 | Cultivated tetraploid upland cotton accession |
| 121 | Yu668          | The Yellow River | 2001 | Cultivated tetraploid upland cotton accession |
| 122 | Jimian10       | The Yellow River | 1984 | Cultivated tetraploid upland cotton accession |
| 123 | Jimian11       | The Yellow River | 1986 | Cultivated tetraploid upland cotton accession |
| 124 | Jimian15       | The Yellow River | 1988 | Cultivated tetraploid upland cotton accession |
| 125 | Jimian20       | The Yellow River | 1996 | Cultivated tetraploid upland cotton accession |

|     |                |                  |      |                                               |
|-----|----------------|------------------|------|-----------------------------------------------|
| 126 | Jimian27       | The Yellow River | 1998 | Cultivated tetraploid upland cotton accession |
| 127 | Jifeng106      | The Yellow River | 2005 | Cultivated tetraploid upland cotton accession |
| 128 | Jihan3         | The Yellow River | 1970 | Cultivated tetraploid upland cotton accession |
| 129 | sGK321         | The Yellow River | 2001 | Cultivated tetraploid upland cotton accession |
| 130 | Handan109      | The Yellow River | 2002 | Cultivated tetraploid upland cotton accession |
| 131 | GK99-1xuanxi   | The Yellow River | 2005 | Cultivated tetraploid upland cotton accession |
| 132 | Han4849        | The Yellow River | 2004 | Cultivated tetraploid upland cotton accession |
| 133 | Lumian9        | The Yellow River | 1990 | Cultivated tetraploid upland cotton accession |
| 134 | Lumian10       | The Yellow River | 1990 | Cultivated tetraploid upland cotton accession |
| 135 | Lumian11       | The Yellow River | 1992 | Cultivated tetraploid upland cotton accession |
| 136 | Lumianyan16    | The Yellow River | 2005 | Cultivated tetraploid upland cotton accession |
| 137 | Lumianyan18    | The Yellow River | 2005 | Cultivated tetraploid upland cotton accession |
| 138 | Jinmian12      | The Yellow River | 1993 | Cultivated tetraploid upland cotton accession |
| 139 | Jinmian21      | The Yellow River | 1997 | Cultivated tetraploid upland cotton accession |
| 140 | Jinmian25      | The Yellow River | 1998 | Cultivated tetraploid upland cotton accession |
| 141 | Jinmian28      | The Yellow River | 1999 | Cultivated tetraploid upland cotton accession |
| 142 | Jinmian29      | The Yellow River | 2000 | Cultivated tetraploid upland cotton accession |
| 143 | Jinmian36      | The Yellow River | 2003 | Cultivated tetraploid upland cotton accession |
| 144 | Shanmian5      | The Yellow River | 1974 | Cultivated tetraploid upland cotton accession |
| 145 | Shanmian6      | The Yellow River | 1975 | Cultivated tetraploid upland cotton accession |
| 146 | Xuzhou58       | The Yellow River | 1972 | Cultivated tetraploid upland cotton accession |
| 147 | Xuzhou209      | The Yellow River | 1955 | Cultivated tetraploid upland cotton accession |
| 148 | Baimian1       | The Yellow River | 2004 | Cultivated tetraploid upland cotton accession |
| 149 | Yinshan4       | The Yellow River | 2005 | Cultivated tetraploid upland cotton accession |
| 150 | Zhengnongmian4 | The Yellow River | 2006 | Cultivated tetraploid upland cotton accession |
| 151 | Yinshan6       | The Yellow River | 2006 | Cultivated tetraploid upland cotton accession |
| 152 | sGK958         | The Yellow River | 2007 | Cultivated tetraploid upland cotton accession |
| 153 | Yinshan7       | The Yellow River | 2008 | Cultivated tetraploid upland cotton accession |
| 154 | Xinzhi5        | The Yellow River | 2008 | Cultivated tetraploid upland cotton accession |
| 155 | Jinke178       | The Yellow River | 2009 | Cultivated tetraploid upland cotton accession |
| 156 | Kelin9828      | The Yellow River | 2009 | Cultivated tetraploid upland cotton accession |
| 157 | Jinkemian9     | The Yellow River | 2010 | Cultivated tetraploid upland cotton accession |



|     |                |                  |      |                                               |
|-----|----------------|------------------|------|-----------------------------------------------|
| 158 | Xinmumian5     | The Yellow River | 2010 | Cultivated tetraploid upland cotton accession |
| 159 | Yinshan8       | The Yellow River | 2010 | Cultivated tetraploid upland cotton accession |
| 160 | Zhongmiansuo79 | The Yellow River | 2010 | Cultivated tetraploid upland cotton accession |
| 161 | Fumian289      | The Yellow River | 2008 | Cultivated tetraploid upland cotton accession |
| 162 | Aomian618      | The Yellow River | 2008 | Cultivated tetraploid upland cotton accession |
| 163 | Baimian5       | The Yellow River | 2011 | Cultivated tetraploid upland cotton accession |
| 164 | Baimian2       | The Yellow River | 2005 | Cultivated tetraploid upland cotton accession |
| 165 | Jinxiumian1    | The Yellow River | 2010 | Cultivated tetraploid upland cotton accession |
| 166 | Kekangmian2    | The Yellow River | 2010 | Cultivated tetraploid upland cotton accession |
| 167 | Xinkang4       | The Yellow River | 2004 | Cultivated tetraploid upland cotton accession |
| 168 | Handan885      | The Yellow River | 2005 | Cultivated tetraploid upland cotton accession |
| 169 | Ji122          | The Yellow River | 2002 | Cultivated tetraploid upland cotton accession |
| 170 | Han7860        | The Yellow River | 2005 | Cultivated tetraploid upland cotton accession |
| 171 | Jimian616      | The Yellow River | 2003 | Cultivated tetraploid upland cotton accession |
| 172 | Hanmian103     | The Yellow River | 2003 | Cultivated tetraploid upland cotton accession |
| 173 | Han685         | The Yellow River | 2002 | Cultivated tetraploid upland cotton accession |
| 174 | Jimian169      | The Yellow River | 2008 | Cultivated tetraploid upland cotton accession |
| 175 | Ji151          | The Yellow River | 2003 | Cultivated tetraploid upland cotton accession |
| 176 | Ji3927         | The Yellow River | 2008 | Cultivated tetraploid upland cotton accession |
| 177 | Ji1516         | The Yellow River | 2003 | Cultivated tetraploid upland cotton accession |
| 178 | Han5158        | The Yellow River | 2005 | Cultivated tetraploid upland cotton accession |
| 179 | Hanmian559     | The Yellow River | 2008 | Cultivated tetraploid upland cotton accession |
| 180 | Hanmian802     | The Yellow River | 2005 | Cultivated tetraploid upland cotton accession |
| 181 | Jimian958      | The Yellow River | 2005 | Cultivated tetraploid upland cotton accession |
| 182 | Guoxinmian9    | The Yellow River | 2009 | Cultivated tetraploid upland cotton accession |
| 183 | Guoxinmian11   | The Yellow River | 2005 | Cultivated tetraploid upland cotton accession |
| 184 | Chuangyoumian9 | The Yellow River | 2008 | Cultivated tetraploid upland cotton accession |
| 185 | Lumianyan27    | The Yellow River | 2006 | Cultivated tetraploid upland cotton accession |
| 186 | Shengmian1     | The Yellow River | 2008 | Cultivated tetraploid upland cotton accession |
| 187 | Jinmian38      | The Yellow River | 2004 | Cultivated tetraploid upland cotton accession |
| 188 | Lumianyan29    | The Yellow River | 2006 | Cultivated tetraploid upland cotton accession |
| 189 | Lumianyan28    | The Yellow River | 2006 | Cultivated tetraploid upland cotton accession |

|     |                |                  |         |                                               |
|-----|----------------|------------------|---------|-----------------------------------------------|
| 190 | Guanmian4      | The Yellow River | 2008    | Cultivated tetraploid upland cotton accession |
| 191 | Lumianyan32    | The Yellow River | 2008    | Cultivated tetraploid upland cotton accession |
| 192 | sGK791         | The Yellow River | 2006    | Cultivated tetraploid upland cotton accession |
| 193 | Lukenmian33    | The Yellow River | unknown | Cultivated tetraploid upland cotton accession |
| 194 | Xinqiu4        | The Yellow River | 2009    | Cultivated tetraploid upland cotton accession |
| 195 | Lumianyan36    | The Yellow River | 2009    | Cultivated tetraploid upland cotton accession |
| 196 | Lumianyan37    | The Yellow River | 2009    | Cultivated tetraploid upland cotton accession |
| 197 | Yinxingmian4   | The Yellow River | 2010    | Cultivated tetraploid upland cotton accession |
| 198 | K638           | The Yellow River | 2010    | Cultivated tetraploid upland cotton accession |
| 199 | Huamian5       | The Yellow River | 2010    | Cultivated tetraploid upland cotton accession |
| 200 | Shannongmian8  | The Yellow River | 2010    | Cultivated tetraploid upland cotton accession |
| 201 | Jimian228      | The Yellow River | 2005    | Cultivated tetraploid upland cotton accession |
| 202 | Delinong5      | The Yellow River | 2010    | Cultivated tetraploid upland cotton accession |
| 203 | Lumianyan22    | The Yellow River | 2004    | Cultivated tetraploid upland cotton accession |
| 204 | Renhe39        | The Yellow River | 2009    | Cultivated tetraploid upland cotton accession |
| 205 | Yinrui361      | The Yellow River | 2007    | Cultivated tetraploid upland cotton accession |
| 206 | Xinqiu1        | The Yellow River | 2006    | Cultivated tetraploid upland cotton accession |
| 207 | sGKmianxiang69 | The Yellow River | 2008    | Cultivated tetraploid upland cotton accession |
| 208 | Zhengmian18    | The Yellow River | 2010    | Cultivated tetraploid upland cotton accession |
| 209 | Liumian2       | The Yellow River | 2010    | Cultivated tetraploid upland cotton accession |
| 210 | Jinmian13      | The Yellow River | 1993    | Cultivated tetraploid upland cotton accession |
| 211 | Jinmian19      | The Yellow River | 1995    | Cultivated tetraploid upland cotton accession |
| 212 | W-7            | The Yellow River | unknown | Cultivated tetraploid upland cotton accession |
| 213 | W-5            | The Yellow River | unknown | Cultivated tetraploid upland cotton accession |
| 214 | W-2            | The Yellow River | unknown | Cultivated tetraploid upland cotton accession |
| 215 | W-3            | The Yellow River | unknown | Cultivated tetraploid upland cotton accession |
| 216 | W-6            | The Yellow River | unknown | Cultivated tetraploid upland cotton accession |
| 217 | W-8            | The Yellow River | unknown | Cultivated tetraploid upland cotton accession |
| 218 | Jiaxing1       | The Yellow River | 1999    | Cultivated tetraploid upland cotton accession |
| 219 | Lu668-4        | The Yellow River | unknown | Cultivated tetraploid upland cotton accession |
| 220 | Lumianyan17    | The Yellow River | 2003    | Cultivated tetraploid upland cotton accession |
| 221 | W-1            | The Yellow River | unknown | Cultivated tetraploid upland cotton accession |

|     |                     |                                      |         |                                               |
|-----|---------------------|--------------------------------------|---------|-----------------------------------------------|
| 222 | W-4                 | The Yellow River                     | unknown | Cultivated tetraploid upland cotton accession |
| 223 | Zhongzhimian2xuanxi | The Yellow River                     | unknown | Cultivated tetraploid upland cotton accession |
| 224 | Xinluzao1           | Northwestern inland                  | 1991    | Cultivated tetraploid upland cotton accession |
| 225 | Xinluzao3           | Northwestern inland                  | 1987    | Cultivated tetraploid upland cotton accession |
| 226 | Xinluzao5           | Northwestern inland                  | 1994    | Cultivated tetraploid upland cotton accession |
| 227 | Xinluzao7           | Northwestern inland                  | 1997    | Cultivated tetraploid upland cotton accession |
| 228 | Xinluzao8           | Northwestern inland                  | 1997    | Cultivated tetraploid upland cotton accession |
| 229 | Xinluzao9           | Northwestern inland                  | 1999    | Cultivated tetraploid upland cotton accession |
| 230 | Xinluzao12          | Northwestern inland                  | 2000    | Cultivated tetraploid upland cotton accession |
| 231 | Xinluzao13          | Northwestern inland                  | 2002    | Cultivated tetraploid upland cotton accession |
| 232 | Xinluzao20          | Northwestern inland                  | 2005    | Cultivated tetraploid upland cotton accession |
| 233 | Xinluzao22          | Northwestern inland                  | 2005    | Cultivated tetraploid upland cotton accession |
| 234 | Xinluzao26          | Northwestern inland                  | 2005    | Cultivated tetraploid upland cotton accession |
| 235 | Xinluzao28          | Northwestern inland                  | 2005    | Cultivated tetraploid upland cotton accession |
| 236 | Xinluzao30          | Northwestern inland                  | 2005    | Cultivated tetraploid upland cotton accession |
| 237 | Xinluzao32          | Northwestern inland                  | 2005    | Cultivated tetraploid upland cotton accession |
| 238 | Xinluzhong2         | Northwestern inland                  | 1988    | Cultivated tetraploid upland cotton accession |
| 239 | Xinluzhong8         | Northwestern inland                  | 1999    | Cultivated tetraploid upland cotton accession |
| 240 | Xinluzhong21        | Northwestern inland                  | 2004    | Cultivated tetraploid upland cotton accession |
| 241 | Xinluzhong33        | Northwestern inland                  | 2007    | Cultivated tetraploid upland cotton accession |
| 242 | Xinluzhong26        | Northwestern inland                  | 2006    | Cultivated tetraploid upland cotton accession |
| 243 | Xinluzhong35        | Northwestern inland                  | 2007    | Cultivated tetraploid upland cotton accession |
| 244 | Xinluzhong44        | Northwestern inland                  | 2010    | Cultivated tetraploid upland cotton accession |
| 245 | Liaomian4           | Northern (Specific early maturation) | 1972    | Cultivated tetraploid upland cotton accession |
| 246 | Guannong1           | Northern (Specific early maturation) | 1930    | Cultivated tetraploid upland cotton accession |
| 247 | Heishanmian1        | Northern (Specific early maturation) | 1974    | Cultivated tetraploid upland cotton accession |
| 248 | Liaomian1           | Northern (Specific early maturation) | 1959    | Cultivated tetraploid upland cotton accession |
| 249 | Liaomian3           | Northern (Specific early maturation) | 1971    | Cultivated tetraploid upland cotton accession |
| 250 | Liaomian6           | Northern (Specific early maturation) | 1980    | Cultivated tetraploid upland cotton accession |
| 251 | Liaomian9           | Northern (Specific early maturation) | 1984    | Cultivated tetraploid upland cotton accession |
| 252 | Liaomian13          | Northern (Specific early maturation) | 1994    | Cultivated tetraploid upland cotton accession |
| 253 | Liaomian14          | Northern (Specific early maturation) | 1996    | Cultivated tetraploid upland cotton accession |

|     |               |                                      |         |                                               |
|-----|---------------|--------------------------------------|---------|-----------------------------------------------|
| 254 | Liaomian16    | Northern (Specific early maturation) | 1999    | Cultivated tetraploid upland cotton accession |
| 255 | Liaomian17    | Northern (Specific early maturation) | 2000    | Cultivated tetraploid upland cotton accession |
| 256 | Liaomian19    | Northern (Specific early maturation) | 2003    | Cultivated tetraploid upland cotton accession |
| 257 | Jinyu5        | Northern (Specific early maturation) | 1955    | Cultivated tetraploid upland cotton accession |
| 258 | Jinmian1      | Northern (Specific early maturation) | 1958    | Cultivated tetraploid upland cotton accession |
| 259 | Jinmian6      | Northern (Specific early maturation) | 1996    | Cultivated tetraploid upland cotton accession |
| 260 | Chaoyangmian1 | Northern (Specific early maturation) | 1956    | Cultivated tetraploid upland cotton accession |
| 261 | Foster6       | from the US                          | 1933    | Cultivated tetraploid upland cotton accession |
| 262 | King          | from the US                          | 1890    | Cultivated tetraploid upland cotton accession |
| 263 | DPL15         | from the US                          | 1950    | Cultivated tetraploid upland cotton accession |
| 264 | Stoneville2B  | from the US                          | 1947    | Cultivated tetraploid upland cotton accession |
| 265 | DPL16         | from the US                          | 1970    | Cultivated tetraploid upland cotton accession |
| 266 | DP99B         | from the US                          | unknown | Cultivated tetraploid upland cotton accession |
| 267 | NC20B         | from the US                          | unknown | Cultivated tetraploid upland cotton accession |

---

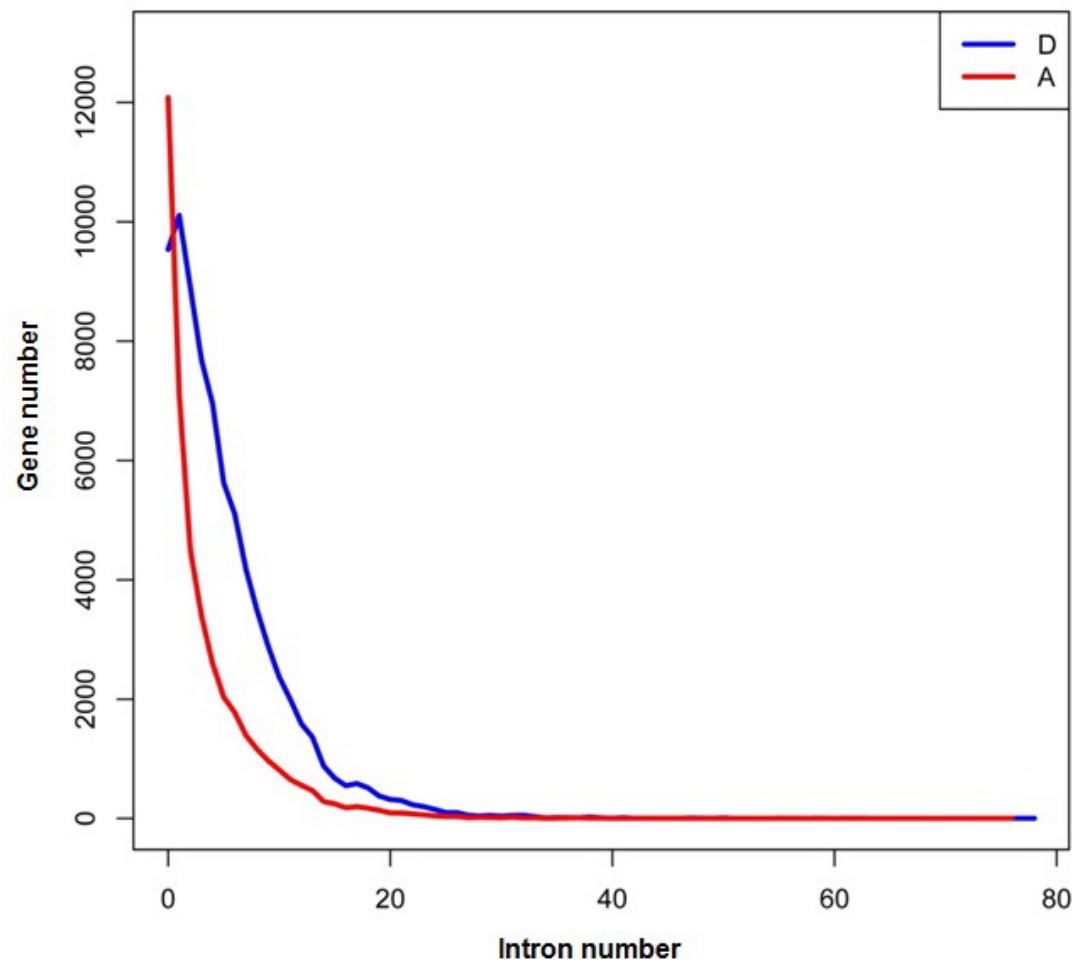

**Supplementary Fig. S1:** The number and distribution of introns in A- and D-genome cotton species.
